# Supplementary material for: Prediction of major adverse cardiac, cerebrovascular events in patients with diabetes after acute coronary syndrome
Source: PubMed Central journal article supplement — Diab Vasc Dis Res. 2019 Dec 16;17(1):1479164119892137. doi: 10.1177/1479164119892137 (PMC7510367; doi:10.1177/1479164119892137), 2019-12-16
Supplement: Online_appendix_1_Table.pdf [file Online_appendix_1_Table.pdf]

## Online appendix 1: Population characteristics by LVEF category.

| variable                 | category               | Total        | > 51% N=934 | 41-51% N=213 | 30-40%<br>N=204 | ≤ 30%<br>N=49 | p-value  |
|--------------------------|------------------------|--------------|-------------|--------------|-----------------|---------------|----------|
| Gender - female          |                        | 415          | 307         | 40           | 60              | 8             | 0.0003   |
| Age (mean ± SD)          |                        | 69.6 ± 10.8  | 68.9 ± 10.8 | 69.2 ± 11.2  | 72.5 ± 10.3     | 71.7 ± 8.3    | 0.00077  |
| BMI (mean ± SD)          |                        | 29.9 ± 11.9  | 30.1 ± 10.2 | 31.1 ± 21.3  | 28.4 ± 4.9      | 27.1 ± 3      | < 0.0001 |
| Hypertension             |                        | 1020         | 694         | 143          | 152             | 31            | 0.11     |
| Smoker                   |                        | 258          | 173         | 49           | 27              | 9             | 0.13     |
| LVEF (mean ± SD)         |                        | 53.9 ± 11.7  | 61 ± 4.4    | 47 ± 2.8     | 35.8 ± 3.8      | 23.8 ± 3.2    | < 0.0001 |
| Periph. arterial disease |                        | 209          | 120         | 37           | 40              | 12            | 0.02     |
| Previous CHF             |                        | 95           | 30          | 15           | 38              | 12            | < 0.0001 |
| CKD                      |                        | 147          | 77          | 21           | 37              | 12            | < 0.0001 |
| GRACE (mean ± SD)        |                        | 148.7 ± 36.5 | 140.1 ± 33  | 154.4 ± 35.2 | 175.6 ± 35.1    | 178.5 ± 37.8  | < 0.0001 |
| Killip                   | 1                      | 1072         | 811         | 150          | 97              | 14            | < 0.0001 |
|                          | 2                      | 230          | 94          | 43           | 68              | 25            |          |
|                          | 3                      | 77           | 23          | 19           | 28              | 7             |          |
|                          | 4                      | 21           | 6           | 1            | 11              | 3             |          |
| Number of vessels        | 0 or 1 vessel          | 750          | 523         | 110          | 97              | 20            | 0.05     |
|                          | 2 or 3 vessels         | 574          | 369         | 92           | 91              | 22            |          |
|                          | Left main +0/1 vessels | 14           | 6           | 3            | 3               | 2             |          |
|                          | Left main +2/3 vessels | 62           | 36          | 8            | 13              | 5             |          |
| Complete                 | revascularization      | 520          | 365         | 81           | 63              | 11            | 0.05     |
| CABG                     |                        | 76           | 50          | 17           | 7               | 2             | 0.27     |
| Aspirin                  |                        | 1261         | 842         | 196          | 183             | 40            | 0.24     |
| Clopidogrel              |                        | 948          | 630         | 136          | 151             | 31            | 0.18     |
| OACs                     |                        | 142          | 82          | 26           | 28              | 6             | 0.16     |
| Beta-blockers            |                        | 924          | 617         | 142          | 133             | 32            | 0.99     |
| ACEI-ARB treatment       |                        | 971          | 621         | 166          | 148             | 36            | 0.01     |
| Estatins                 |                        | 1174         | 791         | 175          | 169             | 39            | 0.68     |
| Diuretics                |                        | 407          | 197         | 71           | 111             | 28            | < 0.0001 |
| MACE in follow-up        |                        | 783          | 487         | 113          | 148             | 35            | < 0.0001 |
| MI in follow-up          |                        | 293          | 203         | 43           | 39              | 8             | 0.72     |
| CVA in follow-up         |                        | 75           | 54          | 7            | 12              | 2             | 0.58     |
| CHF in follow-up         |                        | 374          | 203         | 67           | 82              | 22            | < 0.0001 |
| Sudden death             |                        | 40           | 17          | 8            | 12              | 3             | 0.58     |

BMI: body mass index; CABG: coronary artery bypass grafting; CHF: congestive heart failure; CKD: chronic kidney disease; CVA: cerebrovascular accident; HF: heart failure; LVEF: left ventricle ejection fraction; MACCE: major adverse cardiac and cerebrovascular events; MI: myocardial infarction; OAs: oral anticoagulants;
