# Supplementary material for: Prediction of major adverse cardiac, cerebrovascular events in patients with diabetes after acute coronary syndrome
Source: PubMed Central journal article supplement — Diab Vasc Dis Res. 2019 Dec 16;17(1):1479164119892137. doi: 10.1177/1479164119892137 (PMC7510367; doi:10.1177/1479164119892137), 2019-12-16
Supplement: Online_appendix_2_Table.pdf [file Online_appendix_2_Table.pdf]

**Online appendix 2:** Score points associated with the presence/absence/category of each risk factor.

| Variable                 | Range   | Instructions                                                          |
|--------------------------|---------|-----------------------------------------------------------------------|
| Gender - female          | -1 to 0 | -1 point                                                              |
| Age                      | 0 to 15 | points=(Age – 20)/5 (rounded to floor); 1 point/5 years from 20 to 95 |
| LVEF category num        | 0 to 2  | > 51%=0; 41-51%=1; 30-40%=2; ≤ 30%=2                                  |
| Periph. arterial disease | 0 to 1  | 1 point                                                               |
| Previous CHF             | 0 to 1  | 1 point                                                               |
| Killip                   | 0 to 3  | K1=0; K2=1; K3=2; K4=3                                                |
| Optimal medical therapy  | -1 to 0 | -1 point                                                              |

LVEF: left ventricle ejection fraction;
