# Supplementary material for: Prediction of major adverse cardiac, cerebrovascular events in patients with diabetes after acute coronary syndrome
Source: PubMed Central journal article supplement — Diab Vasc Dis Res. 2019 Dec 16;17(1):1479164119892137. doi: 10.1177/1479164119892137 (PMC7510367; doi:10.1177/1479164119892137), 2019-12-16
Supplement: Online_appendix_3_Table.pdf [file Online_appendix_3_Table.pdf]

**Online appendix 3: MACCE risk associated to each score by year of follow-up.**

| Points | CIF 01 year | CIF 02 year | CIF 03 year | CIF 04 year | CIF 05 year | CIF 10 year |
|--------|-------------|-------------|-------------|-------------|-------------|-------------|
| -2     | 0,03        | 0,04        | 0,06        | 0,07        | 0,08        | 0,16        |
| -1     | 0,03        | 0,05        | 0,07        | 0,08        | 0,09        | 0,18        |
| 0      | 0,04        | 0,06        | 0,08        | 0,09        | 0,11        | 0,21        |
| 1      | 0,04        | 0,07        | 0,09        | 0,11        | 0,12        | 0,24        |
| 2      | 0,05        | 0,08        | 0,1         | 0,12        | 0,14        | 0,27        |
| 3      | 0,06        | 0,09        | 0,12        | 0,14        | 0,17        | 0,31        |
| 4      | 0,07        | 0,1         | 0,14        | 0,16        | 0,19        | 0,35        |
| 5      | 0,08        | 0,12        | 0,16        | 0,19        | 0,22        | 0,39        |
| 6      | 0,09        | 0,14        | 0,18        | 0,22        | 0,25        | 0,44        |
| 7      | 0,11        | 0,16        | 0,21        | 0,25        | 0,28        | 0,49        |
| 8      | 0,12        | 0,18        | 0,23        | 0,28        | 0,32        | 0,55        |
| 9      | 0,14        | 0,21        | 0,27        | 0,32        | 0,36        | 0,6         |
| 10     | 0,16        | 0,24        | 0,3         | 0,36        | 0,41        | 0,66        |
| 11     | 0,19        | 0,28        | 0,34        | 0,41        | 0,46        | 0,71        |
| 12     | 0,21        | 0,31        | 0,39        | 0,46        | 0,51        | 0,77        |
| 13     | 0,24        | 0,35        | 0,44        | 0,51        | 0,56        | 0,82        |
| 14     | 0,28        | 0,4         | 0,49        | 0,56        | 0,62        | 0,86        |
| 15     | 0,32        | 0,45        | 0,54        | 0,62        | 0,68        | 0,9         |
| 16     | 0,36        | 0,5         | 0,6         | 0,67        | 0,73        | 0,93        |
| 17     | 0,4         | 0,55        | 0,65        | 0,73        | 0,78        | 0,96        |
| 18     | 0,45        | 0,61        | 0,71        | 0,78        | 0,83        | 0,97        |
| 19     | 0,51        | 0,67        | 0,76        | 0,83        | 0,88        | 0,99        |

|    |      |      |      |      |      |      |
|----|------|------|------|------|------|------|
| 20 | 0,56 | 0,72 | 0,81 | 0,87 | 0,91 | 0,99 |
| 21 | 0,62 | 0,77 | 0,86 | 0,91 | 0,94 | 1    |
| 22 | 0,67 | 0,82 | 0,9  | 0,94 | 0,96 | 1    |

CIF: cumulative incidence function (Fine-Gray competing risks models); MACCE: major adverse cardiac and cerebrovascular events.
