# Supplementary material for: Prediction of major adverse cardiac, cerebrovascular events in patients with diabetes after acute coronary syndrome
Source: PubMed Central journal article supplement — Diab Vasc Dis Res. 2019 Dec 16;17(1):1479164119892137. doi: 10.1177/1479164119892137 (PMC7510367; doi:10.1177/1479164119892137), 2019-12-16
Supplement: Online_appendix_8_Table_survival_macce.pdf [file Online_appendix_8_Table_survival_macce.pdf]

**Online appendix 8: Risk tables for MACCE and survival.**

| <b>Time</b> | <b>N at risk</b> | <b>N of events</b> | <b>% MACCE</b>    | <b>Standard error</b> | <b>lower 95% CI</b> | <b>upper 95% CI</b> |
|-------------|------------------|--------------------|-------------------|-----------------------|---------------------|---------------------|
| 0           | 1400             | 5                  | 0.9964286         | 0.0015943             | 0.9933086           | 0.9995583           |
| 12          | 981              | 294                | 0.7741848         | 0.0115159             | 0.7519399           | 0.7970878           |
| 24          | 826              | 126                | 0.6727125         | 0.0130841             | 0.6475508           | 0.6988519           |
| 36          | 690              | 90                 | 0.5967449         | 0.0138450             | 0.5702170           | 0.6245070           |
| 48          | 582              | 77                 | 0.5291255         | 0.0142618             | 0.5018984           | 0.5578297           |
| 60          | 461              | 59                 | 0.4721081         | 0.0145355             | 0.4444615           | 0.5014744           |
| 72          | 335              | 44                 | 0.4228928         | 0.0148049             | 0.3948489           | 0.4529286           |
| 153         | 1                | 88                 | 0.1648928         | 0.0333612             | 0.1109139           | 0.2451418           |
| <b>Time</b> | <b>N at risk</b> | <b>N of events</b> | <b>% Survival</b> | <b>Standard error</b> | <b>lower 95% CI</b> | <b>upper 95% CI</b> |
| 0           | 1399             | 0                  | 1                 | 0                     | 1                   | 1                   |
| 12          | 1178             | 114                | 0.9137399         | 0.0077274             | 0.8987193           | 0.9290115           |
| 24          | 1054             | 99                 | 0.8358400         | 0.0102984             | 0.8158973           | 0.8562702           |
| 36          | 933              | 68                 | 0.7801322         | 0.0116199             | 0.7576868           | 0.8032425           |
| 48          | 821              | 78                 | 0.7140685         | 0.0128204             | 0.6893779           | 0.7396434           |
| 60          | 668              | 54                 | 0.6637788         | 0.0136262             | 0.6376022           | 0.6910301           |
| 72          | 487              | 37                 | 0.6221429         | 0.0144008             | 0.5945486           | 0.6510179           |
| 153         | 2                | 58                 | 0.2651270         | 0.0989975             | 0.1275317           | 0.5511750           |

CI: confidence interval; MACCE: major adverse cardiac and cerebrovascular events
